# Supplementary material
Source: Springer Nature journal article supplement (https://www.springermedizin.de/resource/supplementary/12916_2011_569_MOESM7_ESM.pdf/9598170)

**A**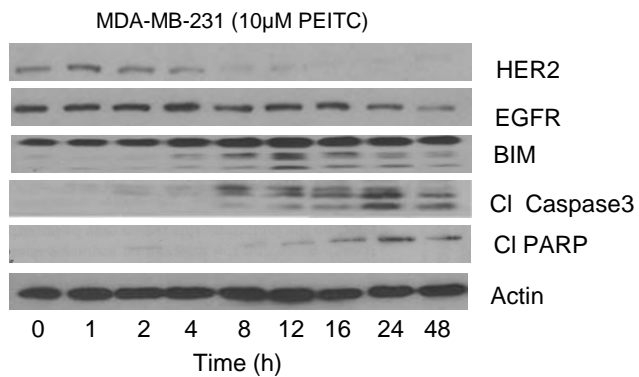**B**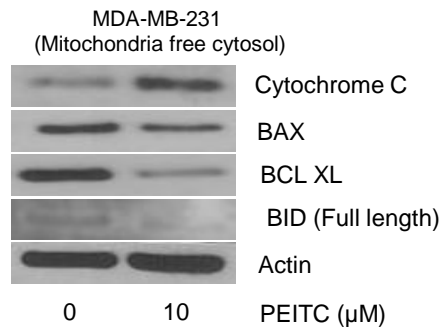**C**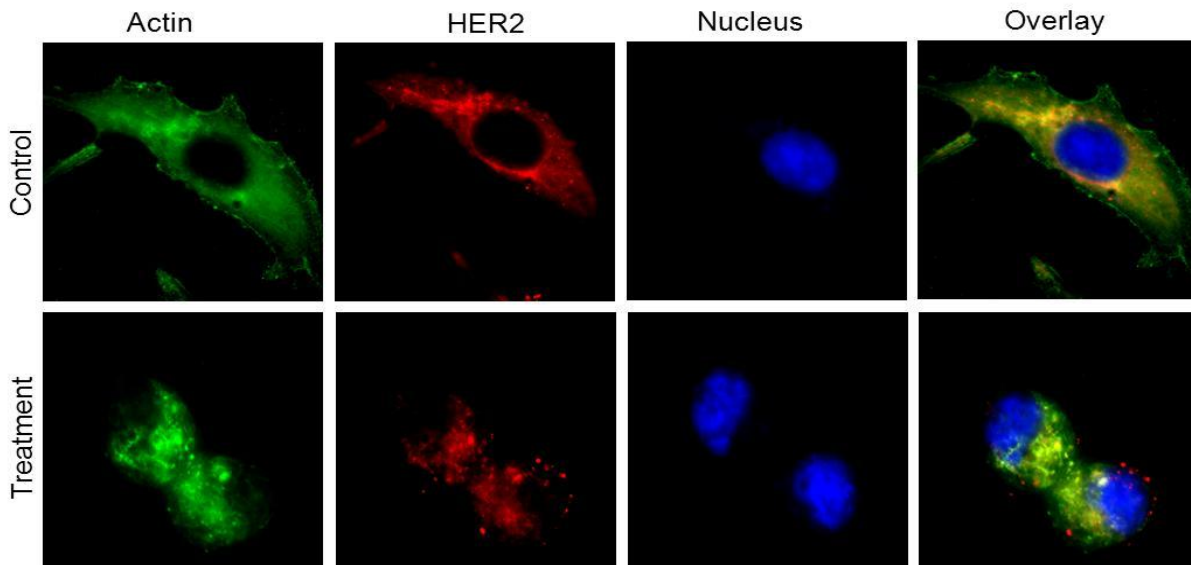

Supplement: MOESM7 [file 9598170]
